# Supplementary material
Source: PubMed Central journal article supplement (PMC3027490)
Supplement: NIHMS262413-supplement-01.pdf [file NIHMS262413-supplement-01.pdf]

## **SUPPORTING INFORMATION**

### **Collective Cell Migration on Artificial Extracellular Matrix Proteins Containing Full-Length Fibronectin Domains**

Eileen Fong<sup>1</sup> and David A. Tirrell<sup>2,3\*</sup>

*<sup>1</sup>Department of Bioengineering, <sup>2</sup>Division of Chemistry and Chemical Engineering,*

*and <sup>3</sup>Joseph J. Jacobs Institute for Molecular Engineering for Medicine*

*California Institute of Technology, Pasadena, California 91125*

\*To whom correspondence should be addressed; email: [tirrell@caltech.edu](mailto:tirrell@caltech.edu)

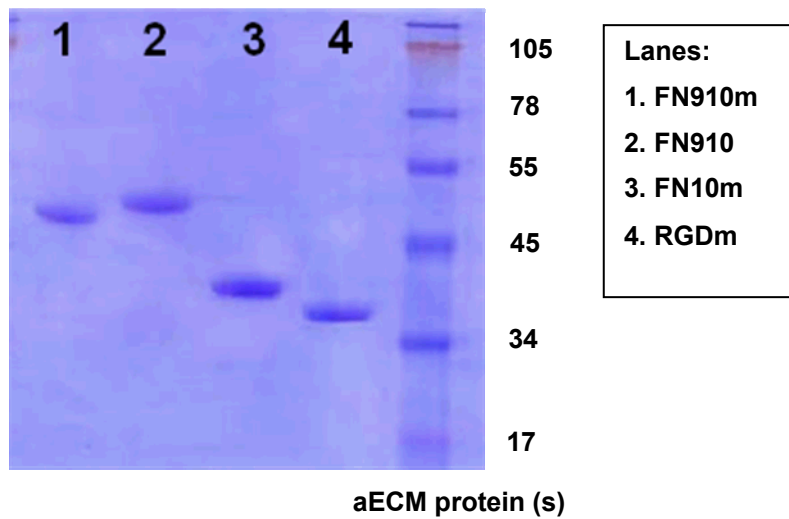

|                                    | <b>FN910</b> | <b>FN910m</b> | <b>FN10m</b> | <b>RGDm</b> |
|------------------------------------|--------------|---------------|--------------|-------------|
| Theoretical molecular weight (kDa) | 49.37        | 49.2          | 39.25        | 30.96       |

**Figure S1** Coomassie-stained SDS-PAGE gel of purified aECM proteins. 10  $\mu$ l of each denatured protein solution (1 mg/ml in PBS pH 7.4) was loaded for each lane and run with SeeBlue Plus2 molecular weight ladder. The theoretical molecular weight of each aECM protein is shown.

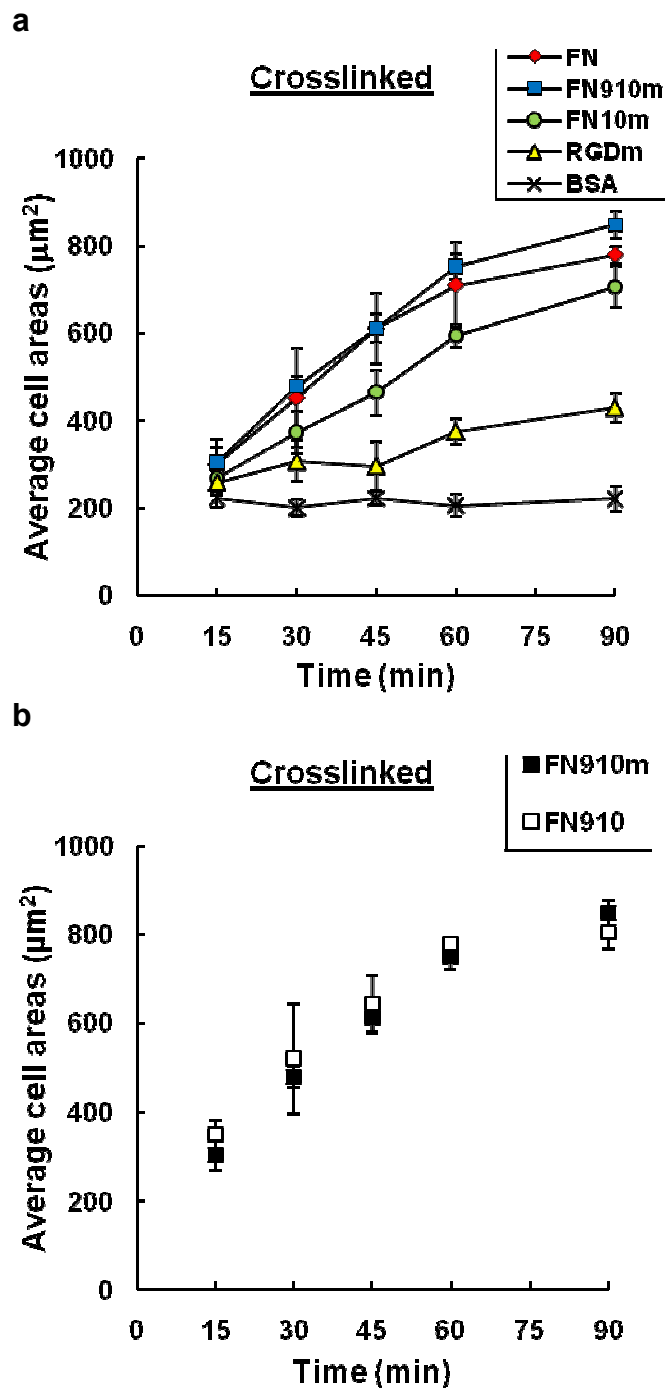

**Figure S2** Time course of cell spreading for crosslinked aECM protein surfaces. Spin-coated aECM protein films were prepared as described previously [1]. a) Cell spreading on spin-coated

crosslinked FN910m, FN10m, and RGDm compared to adsorbed FN and BSA control surfaces.

b) Rat-1 cell spreading on spin-coated crosslinked FN910 and FN910m.

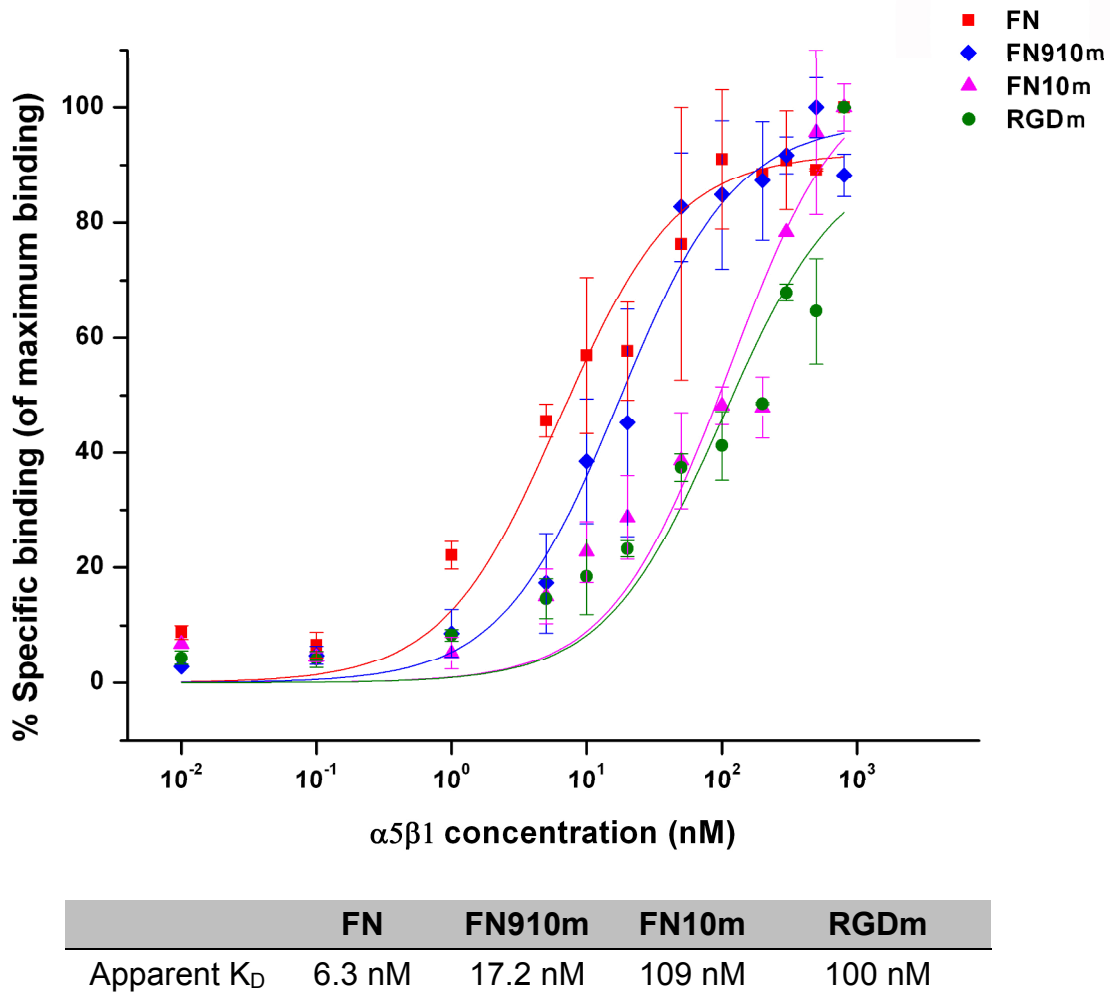

**Figure S3 Binding of  $\alpha_5\beta_1$  integrin to fibronectin and aECM proteins by ELISA.** Individual dose-response curves for various surfaces were corrected for non-specific binding in the BSA wells. Results are normalized and expressed as percentages of maximum binding activity. The apparent  $K_D$ 's were derived by fitting the data to a sigmoidal curve for each surface.

*References*

[1] J. C. Liu, D. A. Tirrell, *Biomacromolecules* **2008**, *9*, 2984-88
